# Supplementary material
Source: PubMed Central journal article supplement (PMC8550481)
Supplement: i1537-2073-23-5-207_s01.pdf [file i1537-2073-23-5-207_s01.pdf]

**Table S1. Multilevel modeling analysis of activity pacing association with physical activity while controlling for demographics, fatigue and perceived risk of overactivity from 14 weeks to 52 weeks postrehabilitation**

| <b>Physical activity, minutes per week</b> |                |               |                |               |                    |               |
|--------------------------------------------|----------------|---------------|----------------|---------------|--------------------|---------------|
|                                            | <b>Model 1</b> |               | <b>Model 2</b> |               | <b>Final model</b> |               |
| <b>Fixed Factors</b>                       | <b>P</b>       | <b>β (SE)</b> | <b>P</b>       | <b>β (SE)</b> | <b>P</b>           | <b>β (SE)</b> |
| Constant                                   |                | 0.01 (0.20)   |                | 0.01 (0.21)   |                    | -0.10 (0.20)  |
| <i>Variables</i>                           |                |               |                |               |                    |               |
| Sex (female)                               | .933           | -0.02 (0.24)  | .938           | 0.02 (0.25)   | .576               | 0.14 (0.24)   |
| Age                                        | .968           | 0.01 (0.12)   | .720           | -0.04 (0.12)  | .691               | 0.05 (0.24)   |
| Body mass index                            | .358           | -0.10 (0.11)  | .329           | -0.12 (0.12)  | .181               | -0.15 (0.12)  |
| Fatigue                                    | .087           | -0.16 (0.09)  |                |               | .334               | -0.09 (0.10)  |
| Risk of overactivity                       |                |               | .175           | -0.01 (0.09)  | .643               | 0.04 (0.09)   |
| Engagement in pacing                       |                |               | .151           | -0.04 (0.10)  | .890               | -0.01 (0.10)  |
| Fatigue x risk of overactivity             |                |               |                |               | .021               | -0.19 (0.08)  |
| Fatigue x engagement in pacing             |                |               |                |               | .844               | 0.02 (0.09)   |
| <b>Random effects</b>                      |                | <b>β (SE)</b> |                | <b>β (SE)</b> |                    | <b>β (SE)</b> |
| Level 1 (within time points)               |                |               |                |               |                    |               |
| Constant                                   |                | 0.41 (0.07)   |                | 0.41 (0.07)   |                    | 0.40 (0.06)   |
| Level 2 (between individuals)              |                |               |                |               |                    |               |
| Constant                                   |                | 0.52 (0.13)   |                | 0.55 (0.14)   |                    | 0.48 (0.12)   |
| Δ Deviance                                 | <.001          | 116.68        | <.001          | 120.77        | <.001              | 129.01        |
| Deviance empty model                       |                | 470.54        |                | 470.54        |                    | 470.54        |

β = Standardized regression coefficients from the complete regression model accounting for all variables.

SE = Standard error

Model 1 = age, sex and body mass as covariates, and fatigue as confounder

Model 2 = perceived risk of overactivity as confounder and engagement in pacing as independent variables

Model 3 = age, sex and body mass were covariates, fatigue and perceived risk of overactivity as confounders, engagement in pacing as independent variable, and the interaction terms of fatigue with engagement in pacing and perceived risk of overactivity

Note: Physical activity was the dependent variable.

**Table S2. Multilevel modeling analysis of activity pacing association with health-related quality of life while controlling for demographics, fatigue and perceived risk of overactivity 14 weeks to 52 weeks postrehabilitation**

| <b>Health-Related Quality of Life</b> |                |               |                |               |                    |               |
|---------------------------------------|----------------|---------------|----------------|---------------|--------------------|---------------|
|                                       | <b>Model 1</b> |               | <b>Model 2</b> |               | <b>Final model</b> |               |
| <b>Fixed Factors</b>                  | <b>P</b>       | <b>β (SE)</b> | <b>P</b>       | <b>β (SE)</b> | <b>P</b>           | <b>β (SE)</b> |
| Constant                              |                | -0.21 (0.16)  |                | -0.21 (0.19)  |                    | -0.27 (0.16)  |
| <i>Variables</i>                      |                |               |                |               |                    |               |
| Sex (female)                          | .153           | 0.27 (0.19)   | .185           | 0.30 (0.23)   | .065               | 0.35 (0.19)   |
| Age                                   | .014           | 0.22 (0.09)   | .177           | 0.15 (0.11)   | .004               | 0.27 (0.09)   |
| Body mass index                       | .006           | -0.25 (0.09)  | .007           | -0.29 (0.11)  | <.001              | -0.32 (0.09)  |
| Fatigue                               | <.001          | -0.38 (0.08)  |                |               | <.001              | -0.33 (0.08)  |
| Risk of overactivity                  |                |               | .728           | 0.03 (0.08)   | .627               | 0.04 (0.08)   |
| Engagement in pacing                  |                |               | .009           | -0.23 (0.09)  | .085               | -0.15 (0.09)  |
| Fatigue x risk of overactivity        |                |               |                |               | .040               | -0.13 (0.06)  |
| Fatigue x engagement in pacing        |                |               |                |               | .974               | 0.00 (0.07)   |
| <b>Random Effects</b>                 |                | <b>β (SE)</b> |                | <b>β (SE)</b> |                    | <b>β (SE)</b> |
| Level 1 (within time points)          |                |               |                |               |                    |               |
| Constant                              |                | 0.38 (0.06)   |                | 0.38 (0.05)   |                    | 0.36 (0.06)   |
| Level 2 (between individuals)         |                |               |                |               |                    |               |
| Constant                              |                | 0.26 (0.08)   |                | 0.46 (0.12)   |                    | 0.25 (0.08)   |
| Δ Deviance                            | <.001          | 58.30         | <.001          | 51.89         | <.001              | 70.85         |
| Deviance empty model                  |                | 378.83        |                | 470.54        |                    | 470.54        |

β = Standardized regression coefficients

SE = Standard error

Model 1 = age, sex and body mass as covariates, and fatigue as confounder

Model 2 = perceived risk of overactivity as confounder and engagement in pacing as independent variables

Model 3 = age, sex and body mass were covariates, fatigue and perceived risk of overactivity as confounders, engagement in pacing as independent variable, and the interaction terms of fatigue with engagement in pacing and perceived risk of overactivity

Note: Health-related quality of life was the dependent variable.
